# Supplementary material
Source: HighWire-hosted journal article supplement (https://mbio.asm.org/content/5/1/e00682-13)
Supplement: inline-supplementary-material-6 [file inline-supplementary-material-6.pdf]

**Table S1****A.**

| <b>OTU ID</b> | <b>Taxon</b>                                                                                                        | <b>Average %</b> |
|---------------|---------------------------------------------------------------------------------------------------------------------|------------------|
| OTU_0         | Bacteria;Proteobacteria;Gammaproteobacteria;Pseudomonadales;Moraxellaceae;Acinetobacter                             | 28.75            |
| OTU_4         | Bacteria;Proteobacteria;Betaproteobacteria;Burkholderiales;Comamonadaceae;Variovorax                                | 12.26            |
| OTU_2         | Bacteria;Proteobacteria;Gammaproteobacteria;Pseudomonadales;Pseudomonadaceae;Pseudomonas                            | 11.08            |
| OTU_5         | Bacteria;Bacteroidetes;Sphingobacteria;Sphingobacteriales;Sphingobacteriaceae;Sphingobacteriaceae; Sphingobacterium | 6.90             |
| OTU_10        | Bacteria;Actinobacteria;Actinobacteria;Actinomycetales;Nocardiaceae;Rhodococcus                                     | 4.94             |
| OTU_7         | Bacteria;Proteobacteria;Alphaproteobacteria;Rhizobiales;Brucellaceae;Ochrobactrum                                   | 4.48             |
| OTU_8         | Bacteria;Bacteroidetes;Flavobacteria;Flavobacteriales;Flavobacteriaceae;Chryseobacterium                            | 3.99             |
| OTU_6         | Bacteria;Proteobacteria;Gammaproteobacteria;Xanthomonadales;Xanthomonadaceae; Stenotrophomonas                      | 3.56             |
| OTU_14        | Bacteria;Bacteroidetes;Sphingobacteria;Sphingobacteriales;Sphingobacteriaceae;Sphingobacteriaceae; Pedobacter       | 2.36             |
| OTU_17        | Bacteria;Proteobacteria;Alphaproteobacteria;Rhizobiales;Rhizobiaceae;Rhizobium                                      | 2.22             |
| OTU_9         | Bacteria;Bacteroidetes;Sphingobacteria;Sphingobacteriales;Cytophagaceae;Dyadobacter                                 | 2.13             |
| OTU_13        | Bacteria;Proteobacteria;Betaproteobacteria;Burkholderiales;Alcaligenaceae;Tetrathlobacter                           | 1.53             |
| OTU_40        | Bacteria;Bacteroidetes;Sphingobacteria;Sphingobacteriales;Sphingobacteriaceae;Sphingobacteriaceae; Pedobacter       | 1.05             |
| OTU_22        | Bacteria;Proteobacteria;Alphaproteobacteria;Rhizobiales;Rhizobiaceae;Kasatia                                        | 1.03             |
| OTU_26        | Bacteria;Bacteroidetes;Sphingobacteria;Sphingobacteriales;Sphingobacteriaceae;Sphingobacteriaceae; Nubsella         | 0.91             |
| OTU_16        | Bacteria;Proteobacteria;Alphaproteobacteria;Sphingomonadales;Sphingomonadaceae; Novosphingobium                     | 0.89             |
| OTU_32        | Bacteria;Bacteroidetes;Sphingobacteria;Sphingobacteriales;Sphingobacteriaceae;Sphingobacteriaceae;Mucilaginibacter  | 0.78             |
| OTU_39        | Bacteria;Proteobacteria;Alphaproteobacteria;Sphingomonadales;Sphingomonadaceae;Sphingomonas                         | 0.74             |
| OTU_35        | Bacteria;Actinobacteria;Actinobacteria;Actinomycetales;Microbacteriaceae;Microbacterium                             | 0.71             |
| OTU_31        | Bacteria;Proteobacteria;Alphaproteobacteria;Rhizobiales;Methylobacteriaceae;Methylobacterium                        | 0.63             |

**B.**

| <b>Taxon</b>                                                                                                     | <b>Day</b> |
|------------------------------------------------------------------------------------------------------------------|------------|
| Actinobacteria.Actinobacteria.Actinomycetales.Microbacteriaceae.Curtobacterium.OTU_21                            | 29         |
| Bacteroidetes.Sphingobacteria.Sphingobacteriales.Sphingobacteriaceae.Sphingobacteriaceae.Sphingobacterium.OTU_5  | 29         |
| Proteobacteria.Alphaproteobacteria.Rhizobiales.Brucellaceae.Ochrobactrum.OTU_7                                   | 29         |
| Bacteroidetes.Sphingobacteria.Sphingobacteriales.Sphingobacteriaceae.Sphingobacteriaceae.Pedobacter.OTU_40       | 34         |
| Proteobacteria.Alphaproteobacteria.Rhizobiales.Brucellaceae.Ochrobactrum.OTU_268                                 | 34         |
| Proteobacteria.Alphaproteobacteria.Rhizobiales.Rhizobiaceae.Kaistia.OTU_22                                       | 39         |
| Bacteroidetes.Sphingobacteria.Sphingobacteriales.Cytophagaceae.Dyadobacter.OTU_9                                 | 45         |
| Bacteroidetes.Sphingobacteria.Sphingobacteriales.Sphingobacteriaceae.Sphingobacteriaceae.Nubsella.OTU_26         | 45         |
| Bacteroidetes.Sphingobacteria.Sphingobacteriales.Sphingobacteriaceae.Sphingobacteriaceae.Pedobacter.OTU_14       | 45         |
| Proteobacteria.Alphaproteobacteria.Rhodospirillales.Acetobacteraceae.Roseococcus.OTU_120                         | 45         |
| Actinobacteria.Actinobacteria.Actinomycetales.Nocardiaceae.Rhodococcus.OTU_10                                    | 50         |
| Proteobacteria.Alphaproteobacteria.Caulobacteriales.Caulobacteraceae.Phenylobacterium.OTU_127                    | 50         |
| Proteobacteria.Alphaproteobacteria.Rhizobiales.Methylobacteriaceae.Methylobacterium.OTU_31                       | 50         |
| Proteobacteria.Betaproteobacteria.Burkholderiales.Alcaligenaceae.Tetrathioibacter.OTU_13                         | 50         |
| Proteobacteria.Gammaproteobacteria.Xanthomonadales.Xanthomonadaceae.Stenotrophomonas.OTU_6                       | 50         |
| Bacteroidetes.Flavobacteria.Flavobacteriales.Flavobacteriaceae.Flavobacterium.OTU_48                             | 55         |
| Bacteroidetes.Sphingobacteria.Sphingobacteriales.Chitinophagaceae.Ferruginibacter.OTU_85                         | 55         |
| Bacteroidetes.Sphingobacteria.Sphingobacteriales.Cytophagaceae.Spirosoma.linguale.OTU_51                         | 55         |
| Bacteroidetes.Sphingobacteria.Sphingobacteriales.Sphingobacteriaceae.Sphingobacteriaceae.Mucilaginibacter.OTU_32 | 55         |
| Proteobacteria.Alphaproteobacteria.Rhizobiales.Hyphomicrobiaceae.Devosia.OTU_45                                  | 55         |
| Proteobacteria.Alphaproteobacteria.Sphingomonadales.Sphingomonadaceae.Sphingomonas.OTU_101                       | 55         |
| Proteobacteria.Betaproteobacteria.Burkholderiales.Comamonadaceae.Comamonas.OTU_71                                | 55         |
| Proteobacteria.Betaproteobacteria.Burkholderiales.Comamonadaceae.Variovorax.OTU_4                                | 55         |
| Actinobacteria.Actinobacteria.Actinomycetales.Nocardiaceae.Rhodococcus.OTU_243                                   | 60         |
| Actinobacteria.Actinobacteria.Actinomycetales.Nocardiaceae.Rhodococcus.OTU_377                                   | 60         |
| Actinobacteria.Actinobacteria.Solirubrobacterales.Patulibacteraceae.Patulibacter.OTU_131                         | 60         |
| Bacteroidetes.Flavobacteria.Flavobacteriales.Flavobacteriaceae.Chryseobacterium.OTU_8                            | 60         |
| Bacteroidetes.Flavobacteria.Flavobacteriales.Flavobacteriaceae.Flavobacterium.OTU_67                             | 60         |

|                                                                                                |    |
|------------------------------------------------------------------------------------------------|----|
| Bacteroidetes.Sphingobacteria.Sphingobacteriales.Chitinophagaceae.OTU_176                      | 60 |
| Cyanobacteria.OTU_142                                                                          | 60 |
| OP10.OTU_105                                                                                   | 60 |
| Proteobacteria.Alphaproteobacteria.Rhizobiales.Bradyrhizobiaceae.OTU_253                       | 60 |
| Proteobacteria.Alphaproteobacteria.Rhizobiales.Bradyrhizobiaceae.Rhodopseudomonas.OTU_30       | 60 |
| Proteobacteria.Alphaproteobacteria.Rhizobiales.Hyphomicrobiaceae.Ancylobacter.OTU_63           | 60 |
| Proteobacteria.Alphaproteobacteria.Rhizobiales.Rhizobiaceae.Rhizobium.OTU_102                  | 60 |
| Proteobacteria.Alphaproteobacteria.Rhizobiales.Rhizobiaceae.Rhizobium.OTU_17                   | 60 |
| Proteobacteria.Alphaproteobacteria.Rhizobiales.Unassigned.Nordella.OTU_99                      | 60 |
| Proteobacteria.Alphaproteobacteria.Sphingomonadales.OTU_95                                     | 60 |
| Proteobacteria.Alphaproteobacteria.Sphingomonadales.Sphingomonadaceae.Novosphingobium.OTU_16   | 60 |
| Proteobacteria.Alphaproteobacteria.Sphingomonadales.Sphingomonadaceae.Sphingomonas.soli.OTU_60 | 60 |
| Proteobacteria.Betaproteobacteria.Burkholderiales.Alcaligenaceae.Pigmentiphaga.OTU_140         | 60 |
| Verrucomicrobia.Verrucomicrobiae.Verrucomicrobiales.Verrucomicrobiaceae.Prosthecoacter.OTU_50  | 60 |
